1 **Metabolic responses to food and temperature in deep-sea isopods, *Bathynomus doederleini***

2

3 Shogo Tanaka<sup>a</sup>, Yurika Ono<sup>a</sup>, Shin-ichiro Tanimae<sup>a</sup>, Toru Moriyama<sup>b</sup>, Shingo Fujimoto<sup>c</sup>, Mitsuharu  
4 Yagi<sup>a, d, e, \*</sup>

5

6 <sup>a</sup> Graduate School of Fisheries and Environmental Sciences, Nagasaki University, Nagasaki 852-8521,  
7 Japan

8 <sup>b</sup> Graduate School of Science and Technology, Shinshu University, Nagano 386-8567, Japan

9 <sup>c</sup> Tropical Biosphere Research Center, University of the Ryukyus, Okinawa 903-0213, Japan

10 <sup>d</sup> Faculty of Fisheries, Nagasaki University, Nagasaki University, Nagasaki 852-8521, Japan

11 <sup>e</sup> Institute of Integrated Science and Technology, Nagasaki University, Nagasaki 852-8521, Japan

12

13 \* Corresponding author. Institute of Integrated Science and Technology, Nagasaki University,  
14 Nagasaki, Japan.

15 *E-mail address:* yagi-m@nagasaki-u.ac.jp (M. Yagi).

16

17 **ABSTRACT**

18 Metabolic rate, the energy required per unit of time for an organism to sustain life, is influenced by  
19 both intrinsic and extrinsic factors. Despite the similarities among living organisms across the various  
20 domains of life, it has been observed that those adapted to deep-sea environments exhibit notable  
21 distinctions from those in shallower waters, even when accounting for size and temperature. However,  
22 as deep-sea organisms are infrequently kept in captivity for prolonged periods, investigations into their  
23 potential metabolic responses to food and temperature have yet to be conducted. In this study, we  
24 demonstrate the impact of food (specific dynamic action: *SDA*) and temperature ( $Q_{10}$ ) on the metabolic  
25 rate of the deep-sea isopod *Bathynomus doederleini*. Positive correlations were found between *SDA*  
26 parameters (peak, time to peak, duration, and factorial scope) and meal size in deep-sea organisms.  
27 The postprandial metabolic rate, at a meal size of 45.4%, increased by approximately 6.5-fold, and the  
28 duration was 20 days. Within the temperature range of their natural habitat, the overall  $Q_{10}$  was 2.36,  
29 indicating that a 10 °C increase would lead to a 2.4-fold increase in resting metabolic rate. The mean  
30 metabolic rate of this species, corrected for the equivalent temperature, was significantly 63% lower  
31 than the metabolic scaling rule for aquatic invertebrates. This low metabolic rate suggests that deep-  
32 sea isopods can survive for a year on a mere few grams of whale blubber at a water temperature of  
33 10.5 °C. This information is crucial for understanding the metabolic strategies and consequences of  
34 adaptation to a deep-sea environment.

35

36 **Keywords:** Oxygen consumption, Metabolic scaling,  $Q_{10}$ , Metabolism, Specific Dynamic Action, *SDA*

37

## 38 1. Introduction

39

40 Aerobic organisms sustain themselves by utilizing oxygen to metabolize nutrients in their bodies  
41 and generate energy. The metabolic rate, which is the energy expenditure per unit time required for an  
42 organism to survive, is often referred to as the "fire of life." Energy metabolism is largely constrained  
43 by physical and kinetic factors, such as body size and temperature (Peters, 1983; Calder, 1984;  
44 Schmidt-Nielsen, 1984; Blaxter, 1989; Brown and West, 2000; Glazier, 2005). The rate of increase in  
45 metabolic rate for a 10 °C increase in temperature is known as the  $Q_{10}$  (Schmidt-Nielsen, 1997). It has  
46 been posited that metabolic rate may also be influenced by factors such as an organism's activity level  
47 (Biro and Stamps, 2010), ontogenetic stage (Yagi et al., 2010; Yagi and Oikawa, 2014), taxonomic  
48 and phylogenetic status (Hayssen and Lacy, 1985), geographic range and distribution patterns  
49 (Lovegrove, 2000), habitat temperature conditions (MacMillen and Garland, 1989), and the  
50 availability and preferences of resources (McNab, 1986).

51 The correlation between resting metabolic rate and body size after adjusting for temperature,  
52 known as metabolic scaling, has been the subject of extensive research for a considerable period. In  
53 his seminal work, Hemmingsen (1960) established that the following allometric equation could  
54 adequately express the relationship between metabolic rate and body size across various taxa:

55

$$56 M_R = a_i B^b \quad (i = 1-3)$$

57

58 where MR represents resting metabolic rate, B denotes body mass,  $a$  represents a scaling constant and  
59  $b$  signifies the scaling exponent. The value of  $i$  denotes the three different animal groups (homeotherms,  
60 heterotherms and unicellular organisms), which exhibit distinct values for the scaling constant  
61 (intercepts). Despite ongoing debate regarding the scaling exponent (Kozłowski and Konarzewski,  
62 2004; O'Connor et al., 2007; Harrison, 2017; Glazier, 2022), it has been established that each of these  
63 animal groups displays a consistent trend (Makarieva et al., 2008).

64 Is the "fire of life" less ardent in deep-sea organisms? The deep sea environment is characterized  
65 by decreasing temperatures and increasing pressures with increasing water depth, as well as being  
66 oligotrophic and having a significantly reduced light intensity (Merrett and Haedrich, 1997). Some  
67 deep-sea organisms that have adapted to such conditions exhibit lower metabolic rates than their  
68 shallow-water counterparts, even after accounting for temperature and body size adjustments (Seibel  
69 and Drazen, 2007). The "visual-interaction hypothesis" has been proposed to explain this phenomenon  
70 (Childress and Mickel, 1985; Seibel and Drazen, 2007). This hypothesis posits that visually mediated  
71 predation and prey behaviour diminish with increasing depth (reduced light), rendering active  
72 swimming redundant in deeper and darker environments. As a result, metabolic activity has evolved

73 to decrease with depth in visually developed organisms (Seibel and Drazen, 2007). This trend has been  
74 observed in cephalopods, crustaceans with well-developed vision, and teleost fish (Sullivan and  
75 Somero, 1980; Seibel et al., 1997; Seibel and Drazen, 2007).

76 Even among deep-sea organisms, metabolic reductions may not have evolved in the deep-sea  
77 isopod *Bathynomus doederleini*. This species, which possesses an adult size of approximately 100 mm,  
78 is primarily found in the Pacific Ocean, ranging from Japan to the Philippines at depths of 200 - 600m  
79 (Sekiguchi et al., 1981). Deep-sea isopods are considered benthic scavengers and typically burrow in  
80 the seafloor to evade predation (Matui et al., 2011). The "visual-interaction hypothesis" suggests that  
81 animals with poor visual acuity and those inhabiting the benthos do not exhibit metabolic reductions  
82 with increasing depth (Seibel and Drazen, 2007). Indeed, it has been reported that metabolic rate does  
83 not decrease with increasing depth in benthic crustaceans, octopods, chaetognaths, medusa, and worms,  
84 whose behaviour is not as reliant on vision (Thuesen and Childress, 1993a; Thuesen and Childress,  
85 1993b; Seibel and Childress, 2000; Seibel and Drazen, 2007). However, to the best of our knowledge,  
86 there are no reported metabolic rates for this deep-sea species.

87 Determining the metabolic rate of deep-sea organisms in response to environmental changes  
88 presents a formidable challenge, as sudden fluctuations in water pressure can prove fatal during the  
89 process of capturing and raising them to the surface. Despite the existence of reports of *in vitro* enzyme  
90 activity (Childress and Somero, 1979) and measurements under high-pressure conditions (Mickel and  
91 Childress, 1982) pertaining to deep-sea metabolism, the response of these organisms to varying  
92 environmental conditions remains inadequately understood. Conversely, some studies have conducted  
93 *in situ* measurements of metabolism in deep-sea environments, yielding intriguing insights (e.g. Bailey  
94 et al., 2002). However, metabolic rates that take into account the effects of specific dynamic actions  
95 (*SDA*) have yet to be determined, as the feeding state of the individuals being measured cannot be  
96 controlled. *SDA* refers to the increase in metabolic rate following feeding (McCue, 2006). In order to  
97 exclude the effects of *SDA*, resting metabolic rate should be measured when individuals are fasting  
98 (Kleiber, 1932; Wang et al., 2006; Secor 2009). Notably, no studies on *SDA* in deep-sea organisms  
99 have been conducted to date.

100 Deep-sea isopods possess a durable exoskeleton and lack a swim bladder, rendering them tolerant  
101 to fluctuations in water pressure, indicating their ability to persevere for extended intervals under  
102 ambient pressure, thus facilitating thorough measurements to be conducted under varying conditions.  
103 The overarching objectives of the current study were to investigate: (i) the impact of food intake (*SDA*)  
104 and (ii) the effect of water temperature ( $Q_{10}$ ) on the metabolic rate of the deep-sea isopod. This  
105 knowledge is crucial for comprehending the physiology of deep-sea organisms, specifically metabolic  
106 strategies pertaining to adaptation to the deep-sea milieu, and ecological and evolutionary  
107 bioenergetics.

108

## 109 **2. Materials and methods**

110

### 111 *2.1. Ethics statement*

112

113 All experiments were performed in conformity with Japanese Animal Care protocols and received  
114 approval from the Nagasaki University Fish and Invertebrate Experimental Ethics Committee (Ethics  
115 Approval No. NF-0069).

116

### 117 *2.2. Animals*

118

119 Deep-sea isopods were obtained through the efforts of local fishermen utilizing bait traps in Suruga  
120 Bay and off the coast of Goto Island, Japan in 2021. A total of forty-six specimens (38 from Suruga  
121 Bay and 8 from Goto Island) were conveyed in refrigerated storage to the Fish and Ships Lab, Faculty  
122 of Fisheries at Nagasaki University. Upon arrival, they were promptly transferred to a 200 L black  
123 circular tank (diameter: 0.8 m) until the initiation of experiments. The rearing tank was equipped with  
124 aeration, a filtration system (Ehim 2260, Ehime, Germany), and cooled via a cooling chiller (AZ280X,  
125 Rei-Sea, Tokyo, Japan). The deep-sea isopods were provided with sustenance in the form of swordtip  
126 squid *Uroteuthis edulis* once every two weeks, with the exception of the experimental period. The  
127 rearing water was replaced by half every seven days. The rearing room was consistently shaded, and  
128 observations and experimental settings were conducted under red light. Temperature Data Loggers  
129 (model UTBi-001, Onset Computer Corporation, MA, U.S.A.) were submerged in both the rearing  
130 and experimental tanks. During the rearing period, the mean water temperature ( $\pm$  S.D.) was  $12.1 \pm$   
131  $0.2$  °C and salinity ranged from 33.1 - 34.3 PSU.

132

### 133 *2.3. Respirometry*

134

135 Oxygen consumption during resting status of animals was measured as a proxy of resting metabolic  
136 rate (Yagi et al., 2010). The technique of intermittent-flow respirometry as described by Mochnac et  
137 al. (2017) was employed to measure oxygen consumption. The respirometry unit, with a volume of  
138 approximately 80 L, consisted of a respiration chamber and a water bath, the temperature of which  
139 was regulated by means of a heater and cooler, and was filled with air-saturated seawater. The  
140 respiration chamber was cylindrical in shape (90 mm x 200 mm, 930 mL), fabricated from acrylic and  
141 stirred by a magnetic stirrer. Dissolved oxygen and salinity were measured using an optical multimeter  
142 (Multi3430, Weilheim, Germany). Measurements were taken at intervals of 50-85 minutes (with close  
143 and open times of 20-45 minutes and 30-40 minutes, respectively). The dissolved oxygen never  
144 dropped below 80%. In parallel, a blank control was conducted to calculate the background respiration

145 (which never exceeded 3%). The respiration chamber was covered with a blackout curtain during  
146 measurements.

147  $MO_2$  (expressed in units of  $mgO_2 L^{-1} min^{-1}$ ) was computed by taking into account the decrease in  
148 dissolved oxygen in both the experimental chamber and the blank (absent of animals) as follows:

149

$$150 \quad MO_2 = (\Delta O_{exp} - \Delta O_{blank}) \times (V_{ch} - V_{sp}) / BW \times 60 \times 1000$$

151

152 where  $\Delta O_{exp}$  and  $\Delta O_{blank}$  ( $mgO_2 L^{-1} min^{-1}$ ) are the gradients of linear regression of dissolved oxygen  
153 in the experimental and blank respirometry in relation to the duration of incubation.  $V_{ch}$  denotes the  
154 volume of the respiration chamber (930 mL), and  $V_{sp}$  represents the volume of the specimen,  
155 determined from its body weight. The density of the deep-sea isopods was found to be  $1.225 g mL^{-1}$   
156 as determined by the volumetric method utilising Archimedes' principle.

157

#### 158 2.4. Effects of food (SDA)

159

160 To examine the effects of food on metabolic rate (SDA), pre- and post-feeding oxygen consumption  
161 were assessed. The measurements were conducted at a temperature of  $12.1 \pm 0.3$  °C for a period of 24  
162 hours prior to feeding using individuals that fasted for more than 28 days. The mean wet body weight  
163 ( $\pm$  S.D.) and body length were  $33.0 \pm 4.6$  g and  $100.0 \pm 3.8$  mm ( $n = 14$ ), respectively. The food item  
164 utilized was swordtip squid. In order to achieve significant variation in feeding rate, the feeding time  
165 ranged from 2 to 10 minutes, resulting in a proportion of 6.8 - 45.4% of the body weight. The weight  
166 of the feed was computed by subtracting the weight of the food prior to and after feeding. The period  
167 of measurements varied from 6 to 30 days depending on food intake. During the measurement period,  
168 10 L of seawater in the respiratory tank was changed daily without altering the water temperature.

169

#### 170 2.5. Effects of temperature ( $Q_{10}$ )

171

172 To investigate the effects of temperature on metabolic rate ( $Q_{10}$ ), oxygen consumption was  
173 measured at four distinct temperatures (15, 12, 9 and 6 °C) which are within the temperature range in  
174 which the species is found in the natural habitat (Yagi et al., unpublished data). Five individuals were  
175 randomly selected from the bloodstock tank and placed in three separate 30 L black circular tanks  
176 (diameter: 0.4 m) that were independent of one another. Each tank was equipped with aeration, a  
177 filtration system (Eheim Classic Filter 2213, Deizisau, Germany), and a cooler (Cool Way BK110,  
178 Gex, Osaka, Japan). Ten L of seawater was exchanged every week without altering the temperature in  
179 each tank. Prior to the metabolic rate measurements, the individuals were acclimatized for a minimum  
180 of 14 days at each temperature. The measurements were carried out in descending order from high (15

181 °C) to low (6 °C) temperatures, with the temperatures being decreased to 1 °C per day. During each  
182 acclimation period, the mean water temperature ( $\pm$  S.D.) was  $15.3 \pm 0.2$  °C,  $12.2 \pm 0.2$  °C,  $9.2 \pm 0.2$   
183 °C,  $6.2 \pm 0.2$  °C. The aforementioned experiment was repeated twice in different populations.

184 Measurements were performed on a total of 25 individuals at temperatures of 15 °C (n = 8), 12 °C  
185 (n = 10), 9 °C (n = 8), and 6 °C (n = 9). The mean wet body weight ( $\pm$  S.D.) and body length ( $\pm$  S.D.)  
186 were  $34.0 \pm 2.9$  g and  $102.7 \pm 5.6$  mm (n = 25), respectively. Individuals underwent a fast of at least  
187 14 days prior to the measurement. Prior to the measurements, individuals were acclimated to the  
188 respiration chamber overnight and oxygen consumption was measured three times in each individual.

189

## 190 2.5. Data analysis

191

192 The variables commonly employed to quantify *SDA* - were calculated according to Secor (2009)  
193 and Feher (2017), utilizing the following model equations:

194

$$195 MO_2 = M_R + F \times T \times \exp^{-T/P}$$

196

197 Where  $MO_2$  ( $\text{mgO}_2 \text{ kg}^{-1} \text{ h}^{-1}$ ) represents metabolic rate,  $M_R$  denotes the resting  $MO_2$  averaged over the  
198 6 hours preceding feeding,  $F$  represents meal size (the proportion (%) of food intake (g) divided by  
199 the individual body weight (g)),  $T$  (h) denotes the time elapsed since feeding, and  $P$  (h) represents the  
200 time until peak. Thus, the maximum of the curve occurs at  $T = P$  at an increment of  $F T \exp^{-1}$  (Feher,  
201 2017).  $MO_2$  data between 05:00 AM and 17:00 PM were analyzed in accordance with Roe (2004).  
202 Subsequently, the four parameters were determined (Fig. 1), i.e., (i) peak; postprandial peak in  
203 metabolic rate, (ii) time to peak; duration from time of feeding to peak metabolic rate, (iii) duration;  
204 time from feeding when metabolic rate achieves a 5% increase in resting metabolic rate, (iv) factorial  
205 scope; postprandial peak divided by resting metabolic rate. Linear relationships between *SDA*  
206 parameters and meal size were analyzed by Pearson's correlation coefficient test.

207 An exponential curve was fitted to the effects of temperature on metabolic rate, with metabolic rate  
208 as the dependent variable and temperature as the independent variable.  $Q_{10}$  was calculated by utilizing  
209 the following equation:

210

$$211 Q_{10} = (M_{R2} / M_{R1})^{10 / (Temp_2 - Temp_1)}$$

212

213 where  $M_{R1}$  and  $M_{R2}$  are the known metabolic rates ( $\text{mgO}_2 \text{ kg}^{-1} \text{ h}^{-1}$ ) at their respective temperatures,  
214  $Temp_1$  and  $Temp_2$  (°C) (Schmidt-Nielsen, 1997).

215 To verify the normality and homogeneity of the dataset for the application of parametric analysis,  
216 Shapiro-Wilk and Bartlett tests were conducted. All statistical analyses were performed using R  
217 (Version 4.2.2).

218

### 219 **3. Results**

220

#### 221 3.1 *Effects of food (SDA)*

222

223 Postprandial metabolic rates of deep-sea isopods increased (Fig. 1). Mean resting metabolic rate  
224 ( $M_R \pm$  S.D.) was  $9.5 \pm 5.6$  mgO<sub>2</sub> kg<sup>-1</sup> h<sup>-1</sup>, ranging from 3.9 to 21.6 mgO<sub>2</sub> kg<sup>-1</sup> h<sup>-1</sup> (n = 14).

225 All *SDA* parameters displayed a dependency on meal size, with statistical significance (peak; t =  
226 4.39, p < 0.001, time to peak; t = 2.19, p = 0.049, duration; t = 2.53, p = 0.026, factorial scope; t =  
227 2.75, P = 0.018) (Fig. 2). Peak and time to peak ranged from 18.6 to 51.6 (Fig. 2a), and 0.5 to 5.6 (Fig.  
228 2b), respectively. Duration and factorial scope ranged from 3.1 to 33.3 (Fig. 2c), and from 0.9 to 12.0  
229 (Fig. 2d), respectively.

230

#### 231 3.2. *Effects of temperature (Q<sub>10</sub>)*

232

233 The resting metabolic rate significantly increased with increasing temperature (Fig. 3). The mean  
234 resting metabolic rate ( $\pm$  S.D.) at each temperature was  $20.2 \pm 4.1$  (15 °C, n = 8),  $15.8 \pm 4.9$  (12 °C, n  
235 = 10),  $12.6 \pm 5.5$  (9 °C, n = 8) and  $9.1 \pm 2.9$  mgO<sub>2</sub> kg<sup>-1</sup> h<sup>-1</sup> (6 °C, n = 9). The overall  $Q_{10}$  was 2.36, and  
236 the one at each temperature range was 2.20 (15-12 °C), 1.80 (12-9 °C) and 3.30 (9-6 °C).

237

### 238 **4. Discussion**

239

240 This study quantified the responses of food and temperature on metabolic rate in deep-sea isopods  
241 through long-term rearing and temperature acclimation experiments. To the best of our knowledge,  
242 this is the first report of a positive correlation between *SDA* parameters (peak, time to peak, duration,  
243 and factorial scope) and meal size in deep-sea organisms. The postprandial metabolic rate at a meal  
244 size of 45.4% increased by approximately 6.5-fold and the duration was 20 days. Within the water  
245 temperature range of the species' natural habitat, the overall  $Q_{10}$  was 2.36, indicating that a 10 °C  
246 increase would result in a 2.36-fold increase in resting metabolic rate.

247 Deep-sea organisms may possess *SDA* characteristics that reflect their feeding strategy of  
248 consuming large quantities of food infrequently, due to the scarcity of resources in their deep-sea  
249 habitat. The postprandial increase in metabolism, known as *SDA*, reflects the energy requirements  
250 associated with digestion, including the transport, absorption, and storage of nutrients, as well as

251 increased synthesis of proteins and lipids (Secor, 2009). This study confirms that deep-sea isopods  
252 also possess *SDA*, similar to shallow-water organisms. The duration of *SDA* increased with increasing  
253 meal size (Chakraborty et al., 1992; Janes and Chappell, 1995; Toledo et al., 2003), which is  
254 consistent with the findings of this study. However, the calculated duration of this species was notably  
255 long, reaching up to 33.3 days (Fig. 2). This may reflect the substantial difference in meal size (33.0%),  
256 which is an order of magnitude greater than that of shallow-water organisms. A satiating meal typically  
257 ranges between 2 - 4% of an organism's body weight (Elner, 1980; Robertson et al., 2002), and a 5%  
258 meal size would be considered high for crustaceans (Curtis et al., 2010). For comparison, the American  
259 crayfish *Procambarus clarkii* and the shallow-water crab *Hemigrapsus nudus*, which have similar  
260 body sizes to the deep-sea isopod, have been reported to have maximum meal sizes of 0.5% and 3.0%,  
261 respectively, with durations of 0.47 and 2.51 days (McGaw and Curtis, 2013). Furthermore, the deep-  
262 sea isopods in this study consumed a meal size of 45.4% within 10 minutes, indicating a high feeding  
263 rate. These adaptations allow deep-sea isopods to cope with the intense competition for patchy  
264 resources by rapidly consuming as much food as possible to avoid predation or cannibalism (Barradas-  
265 Ortiz et al., 2003; Smith and Baldwin, 1982).

266 Due to their well-developed digestive systems, deep-sea isopods may adopt an energetic strategy  
267 of increasing the factorial scope for a single large meal size. In this study, it was observed that the  
268 factorial scope of this species increased significantly with increasing meal size (Fig. 2d). Many  
269 organisms, including isopods, have been found to have a factorial scope within the range of 1.5 - 3.0  
270 (Secor, 2009). However, this deep-sea isopod species exhibited a maximum factorial scope of 12.1.  
271 The presence of three pairs of hepatopancreatic glands in the oesophagus, which secrete digestive  
272 enzymes, and the likely use of energy-requiring absorptive processes, facilitated by a well-developed  
273 circulatory system (Kihara and Kuwasawa, 1984), likely contribute to the deep-sea isopod's ability to  
274 consume large meals. However, this increased energy expenditure for *SDA* may also constrain  
275 behavioural activity. Indeed, post-feeding individuals of many meal sizes were observed to be rounded  
276 and static. McCue (2006) suggested that *SDA* scope can be compared to maximal metabolic scope to  
277 estimate the residual capacity for activity during digestion. Interestingly, it is plausible that there exists  
278 a trade-off relationship where more energy is allocated towards *SDA*, and behavioural activity is  
279 constrained.

280 Although deep-sea isopods inhabit deep-oceanic environments, this species exhibits a degree of  
281 adaptability to a relatively broad range of temperatures. The  $Q_{10}$  coefficient, which measures the  
282 sensitivity of an organism's metabolic rate to temperature fluctuations, has been observed to increase  
283 in value as temperatures approach their lethal limit (Christensen et al., 2021). The  $Q_{10}$  of deep-sea  
284 isopods in this study was found to be 2.36 within the temperature range of 6 - 15 °C, a value  
285 comparable to that of many other organisms, typically falling within the range of 2 - 3 (Schmidt-  
286 Nielsen, 1997). However, no significant deviation in  $Q_{10}$  value was observed at temperatures



287 approaching the lethal limit, indicating that deep-sea isopods possess a high degree of adaptability to  
288 these temperature ranges. Indeed, deep-sea isopods are primarily found at depths of 200 - 600 meters  
289 (Sekiguchi et al., 1981). The water temperature immediately above the seafloor in the East China Sea,  
290 where this species occurs, averages 13.8 °C at a depth of 200 meters and 6.6 °C at 600 meters (Yagi  
291 et al., unpublished). This study provides further support for the adaptive nature of this species to the  
292 coastal-bathyal environment, particularly in terms of thermo-metabolic physiology.

293 The fire of life in deep-sea isopods was faint. The visual interaction hypothesis posits that the  
294 metabolic rate of swimming crustaceans and cephalopods significantly diminishes with increasing  
295 depth of habitat, in contrast to a lack of decline in benthic crustaceans and polychaetes (Seibel and  
296 Drazen, 2007). Given that this particular species is benthic, it is predicted that its metabolic rate should  
297 not deviate from that of shallow-water animals, according to the hypothesis. However, the mean  
298 metabolic rate of this species, adjusted for temperature (25 °C), was significantly 63% lower than the  
299 established metabolic scaling relationship for the aquatic invertebrate group (Makarieva et al., 2008)  
300 (Fig. 4). Decreases in metabolic rate have also been documented in benthic carrideans and crustaceans  
301 with increasing depth (Company and Sarda, 1998; Seibel and Drazen, 2007), in conformity with the  
302 present study. At present, additional information on metabolic rate and lifestyle is necessary to validate  
303 the hypothesis (Drazen and Seibel, 2007).

304 According to calculations based on the low metabolic rate of the deep-sea isopod, this species may  
305 survive for a year on 2.1 grams of whale blubber at a temperature of approximately 10 °C. Given the  
306 species' remarkable meal size (Fig. 2), it can be estimated that it would subsist for 6.6 years on a single  
307 diet, although the energy costs associated with foraging, growth, and reproduction would be an  
308 additional factor in reality. Indeed, Ginn et al. (2014) reported that the closely related giant isopod *B.*  
309 *giganteus* lived for five years in aquarium captivity, even after fasting. The deep-sea, low-metabolism  
310 colossal squid *Mesonychoteuthis hamiltoni* (with a body weight of 500 kg) has been estimated to  
311 consume only 30 grams of fish per day, regardless of its giant body size (Rosa et al., 2010).  
312 Nonetheless, the mechanisms underlying low metabolic rates in deep-sea organisms, including this  
313 species, remain poorly understood. It is suggested that mechanisms that preserve low metabolic rates  
314 that do not conform to metabolic scaling may exist, and further research into the metabolism of deep-  
315 sea organisms is crucial.

316

## 317 **Acknowledgements**

318

319 This work was supported by JSPS KAKENHI (Grant Number JP18K14790 and JP21K06337 to  
320 M.Y.). We are grateful to the “Fish and Ships Laboratory” students from the Faculty of Fisheries,  
321 Nagasaki University, who assisted us with the study, and Hisashi Hasegawa, Kazutaka Hasegawa of  
322 the Chokane Maru, which belongs to Kogawa Port in Yaizu City, Shizuoka Prefecture, for capturing

323 the deep-sea isopods. Finally, thanks to the editors and anonymous reviewers for their valuable  
324 comments and suggestions that greatly improved the quality of the manuscript.

325

## 326 **References**

327

328 Bailey, D.M., Jamieson, A.J., Bagley, P.M., Collins, M.A., Priede, I.G., 2002. Measurement of in situ  
329 oxygen consumption of deep-sea fish using an autonomous lander vehicle. *Deep Sea Res. Part*  
330 *I: Oceanogr. Res. Pap.* 49, 1519–1529. <http://dx.doi.org/10.3723/175605404783101567>.

331 Barradas-Ortiz, C., Briones-Fourzán, P., Lozano-Álvarez, E., 2003. Seasonal reproduction and  
332 feeding ecology of giant isopods *Bathynomus giganteus* from the continental slope of the  
333 Yucatán peninsula. *Deep Sea Res. Part I: Oceanogr. Res. Pap.* 50, 495–513.  
334 [https://doi.org/10.1016/S0967-0637\(03\)00036-0](https://doi.org/10.1016/S0967-0637(03)00036-0)

335 Biro, P.A., Stamps, J.A., 2010. Do consistent individual differences in metabolic rate promote  
336 consistent individual differences in behavior? *Trends Ecol. Evol.* 25, 653–659.  
337 <https://doi.org/10.1016/j.tree.2010.08.003>

338 Blaxter, K., 1989. *Energy Metabolism in Animals and Man*. Cambridge University Press, Cambridge.

339 Brown, J.H., West, G.B., 2000. *Scaling in Biology*. Oxford University Press, Oxford.

340 Company, J.B., Sardà, F., 1998. Metabolic rates and energy content of deep-sea benthic decapod  
341 crustaceans in the western Mediterranean Sea. *Deep. Res. Part I: Oceanogr. Res. Pap.* 45, 1861-  
342 1880. [https://doi.org/10.1016/S0967-0637\(98\)00034-X](https://doi.org/10.1016/S0967-0637(98)00034-X)

343 Calder, W.A., 1984. *Size, Function, and Life History*. Harvard University Press, London.

344 Chakraborty, S.C., Ross, L.G., Ross, B., 1992. Specific dynamic action and feeding metabolism in  
345 common carp, *Cyprinus carpio* L. *Comp. Biochem. Physiol., Part A: Mol. Integr. Physiol.* 103,  
346 809–815. [https://doi.org/10.1016/0300-9629\(92\)90185-S](https://doi.org/10.1016/0300-9629(92)90185-S)

347 Childress, J.J., Mickel, T.J., 1985. Metabolic rates of animals from the hydrothermal vents and other  
348 deep-sea habitats. *Biol. Soc. Wash. Bull.* 6, 249–260.

349 Childress, J.J., Somero, G.N., 1979. Depth-related enzymic activities in muscle, brain and heart of  
350 deep-living pelagic marine teleosts. *Mar. Biol.* 52, 273–283.  
351 <https://doi.org/10.1007/BF00398141>

352 Christensen, E.A.F., Norin, T., Tabak, I., van Deurs, M., Behrens, J.W., 2021. Effects of temperature  
353 on physiological performance and behavioral thermoregulation in an invasive fish, the round  
354 goby. *J. Exp. Biol.* 224, jeb237699. <https://doi.org/10.1242/jeb.237669>

355 Curtis, D.L., Vanier, C.H., McGaw, I.J., 2010. The effects of starvation and acute low salinity  
356 exposure on food intake in the Dungeness crab, *Cancer magister*. *Mar. Biol.* 157, 603–612.  
357 <https://doi.org/10.1007/s00227-009-1345-4>

- 358 Drazen, J.C., Seibel, B.A., 2007. Depth-related trends in metabolism of benthic and benthopelagic  
359 deep-sea fishes. *Limnol. Oceanogr.* 52, 2306–2316. <https://doi.org/10.4319/lo.2007.52.5.2306>
- 360 Elner, R.W., 1980. The influence of temperature, sex and chela size in the foraging strategy of the  
361 shore crab, *Carcinus maenas* (L.). *Mar. Behav. Physiol.* 7, 15–24.  
362 <https://doi.org/10.1080/10236248009386968>
- 363 Feher, J., 2017. Energy Balance and Regulation of Food Intake, in: Feher, J. (Eds.), *Quantitative*  
364 *Human Physiology (Second edition) An introduction*. Department of Physiology and Biophysics.  
365 Virginia Commonwealth University School of Medicine, pp. 834-846.  
366 <https://doi.org/10.1016/B978-0-12-800883-6.00082-3>
- 367 Glazier, D.S., 2005. Beyond the “3/4-power law”: Variation in the intra-and interspecific scaling of  
368 metabolic rate in animals. *Biol. Rev. Camb. Philos. Soc.* 80, 611–662.  
369 <https://doi.org/10.1017/S1464793105006834>
- 370 Glazier, D.S., 2022. Variable metabolic scaling breaks the law: from ‘Newtonian’ to ‘Darwinian’  
371 approaches. *Proc. R. Soc. B Biol. Sci.* 289. <https://doi.org/10.1098/rspb.2022.1605>
- 372 Ginn, F., Beisel, U., Barua, M., 2014. Flourishing with awkward creatures: togetherness, vulnerability,  
373 killing. *Environ Humanit.* 4, 113–123. <https://doi.org/10.1215/22011919-3614953>
- 374 Harrison, J.F., 2017. Do Performance–Safety Tradeoffs Cause Hypometric Metabolic Scaling in  
375 Animals? *Trends Ecol. Evol.* 32, 653–664. <https://doi.org/10.1016/j.tree.2017.05.008>
- 376 Hayssen, V., Lacy, R.C., 1985. Basal metabolic rates in mammals: Taxonomic differences in the  
377 allometry of BMR and body mass. *Comp. Biochem. Physiol. A* 81, 741-754.  
378 [https://doi.org/10.1016/0300-9629\(85\)90904-1](https://doi.org/10.1016/0300-9629(85)90904-1)
- 379 Hemmingsen, A.M., 1960. Energy metabolism as related to body size and respiratory surface, and its  
380 evolution. *Rep. Steno. Mem. Hos.* 13, 1-110.
- 381 Jobling, M., 1994. *Fish bioenergetics*. Chapman & Hall, London.
- 382 Janes, D.N., Chappell, M.A., 1995. The effect of ration size and body size on specific dynamic action  
383 in Adélie penguin chicks, *Pygoscelis adeliae*, *Physiol. Zool.* 68, 1029–1044.  
384 <https://doi.org/10.1086/physzool.68.6.30163792>
- 385 Kihara, A., Kuwasawa, K., 1984. Neural control of cardiac output to the arteries in *Bathynomus*  
386 *doederleini*. *Zool. Sei. (Tokyo)*. 1, 874.
- 387 Kleiber, M., 1932. Body size and metabolism. *Hilgardia*. 6, 315-353.
- 388 Kozłowski, J., Konarzewski, M., 2004. Is West, Brown and Enquist’s model of allometric scaling  
389 mathematically correct and biologically relevant? *Funct. Ecol.* 18, 283–289.  
390 <https://doi.org/10.1111/j.0269-8463.2004.00830.x>
- 391 Lovegrove, B.G., 2000. The zoogeography of mammalian basal metabolic rate. *Am. Nat.* 156, 201-  
392 219. <https://doi.org/10.1086/303383>

- 393 MacMillen, R.E., Garland, T., 1989. Adaptive physiology. in: Layne, J., Kirkland, G. (Eds.), Advances  
394 in the study of *Peromyscus* (Rodentia) Texas. Technical University Press, Lubbock, pp. 143-168.
- 395 Makarieva, A.M., Gorshkov, V.G., Li, B.-L., Chown, S.L., Reich, P.B., Gavrilov, V.M., 2008. Mean  
396 mass-specific metabolic rates are strikingly similar across life's major domains: Evidence for  
397 life's metabolic optimum. *Proc. Natl. Acad. Sci.* 105, 16994–16999.  
398 <https://doi.org/10.1073/pnas.0802148105>
- 399 Matsui, T., Moriyama, T., Kato, R., 2011. Burrow plasticity in the deep-sea isopod *Bathynomus*  
400 *doederleini* (Crustacea: Isopoda: Cirolanidae). *Zoolog. Sci.* 28, 863–868.  
401 <https://doi.org/10.2108/zsj.28.863>
- 402 McCue, M.D., 2006. Specific dynamic action: A century of investigation. *Comp. Biochem. Physiol.*,  
403 Part A: Mol. Integr. Physiol. 144, 381–394. <https://doi.org/10.1016/j.cbpa.2006.03.011>
- 404 McGaw, I.J., Curtis, D.L., 2013. Effect of meal size and body size on specific dynamic action and  
405 gastric processing in decapod crustaceans. *Comp. Biochem. Physiol., Part A: Mol. Integr.*  
406 *Physiol.* 166, 414–425. <https://doi.org/10.1016/j.cbpa.2013.07.023>
- 407 McNab, B.K., 1986. The influence of food habits on the energetics of eutherian mammals. *Ecol.*  
408 *Monogr.* 56, 1-19. <https://doi.org/10.2307/2937268>
- 409 Merrett, N.R., Haedrich, R.L., 1997. Deep-Sea Demersal Fish and Fisheries. *Fish Fish. Ser.* 23, 282.
- 410 Mickel, T.J., Childress, J.J., 1982. Effects of Temperature, Pressure, and Oxygen Concentration on  
411 the Oxygen Consumption Rate of the Hydrothermal Vent Crab *Bythograea thermydron*  
412 (Brachyura). *Physiol. Biochem. Zool.* <https://doi.org/10.1086/physzool.55.2.30155856>
- 413 Mochnacz, N.J., Kissinger, B.C., Deslauriers, D., Guzzo, M.M., Enders, E.C., Gary Anderson, W.,  
414 Docker, M.F., Isaak, D.J., Durhack, T.C., Treberg, J.R., 2017. Development and testing of a  
415 simple field-based intermittent-flow respirometry system for riverine fishes. *Conserv. Physiol.*  
416 5, cox048. <https://doi.org/10.1093/conphys/cox048>
- 417 O'Connor, M.P., Kemp, S.J., Agosta, S.J., Hansen, F., Sieg, A.E., Wallace, B.P., McNair, J.N.,  
418 Dunham, A.E., 2007. Reconsidering the mechanistic basis of the metabolic theory of ecology.  
419 *Oikos.* 116, 1058–1072. <https://doi.org/10.1111/j.0030-1299.2007.15534.x>
- 420 Peters, R.H., 1983. The Ecological Implications of Body Size. Cambridge University Press,  
421 Cambridge.
- 422 Robertson, R.F., Meagor, J., Taylor, E.W., 2002. Specific dynamic action in the shore crab, *Carcinus*  
423 *maenas* (L.), in relation to acclimation temperature and to the onset of the Emersion response.  
424 *Physiol. Biochem. Zool.* 75, 350–359. <https://doi.org/10.1086/342801>
- 425 Roe, J.H., Hopkins, W.A., Snodgrass, J.W., Congdon, J.D., 2004. The influence of circadian rhythms  
426 on pre- and post-prandial metabolism in the snake *Lamprophis fuliginosus*. *Comp. Biochem.*  
427 *Physiol., Part A: Mol. Integr. Physiol.* 139, 159-168.  
428 <https://doi.org/10.1016/j.cbpb.2004.08.005>

- 429 Rosa, R., Seibel, B.A., 2010. Slow pace of life of the Antarctic colossal squid. *J. Mar. Biol. Assoc.*  
430 U.K. 90, 1375–137. <https://doi.org/10.1017/S0025315409991494>
- 431 Schmidt-Nielsen, K., 1984. *Scaling: Why Is Animal Size so Important?* Cambridge University Press,  
432 Cambridge.
- 433 Schmidt-Nielsen, K., 1997. *Animal physiology: adaptation and environment*. Cambridge University  
434 Press, Cambridge.
- 435 Secor, S.M., 2009. Specific dynamic action: a review of the postprandial metabolic response. *J. Comp.*  
436 *Physiol., B* 179, 1–56. <https://doi.org/10.1007/s00360-008-0283-7>
- 437 Seibel, B.A., Childress, J.J., 2000. Metabolism of benthic octopods (Cephalopoda) as a function of  
438 habitat depth and oxygen concentration. *Deep Sea Res. Part I: Oceanogr. Res. Pap.* 47, 1247–  
439 1260. [https://doi.org/10.1016/S0967-0637\(99\)00103-X](https://doi.org/10.1016/S0967-0637(99)00103-X)
- 440 Seibel, B.A., Drazen, J.C., 2007. The rate of metabolism in marine animals: environmental constraints,  
441 ecological demands and energetic opportunities. *Philos. Trans. R. Soc., B Bio. Sci.* 362, 2061–  
442 2078. <https://doi.org/10.1098/rstb.2007.2101>
- 443 Seibel, B.A., Thuesen, E. V., Childress, J.J., Gorodezky, L.A., 1997. Decline in pelagic cephalopod  
444 metabolism with habitat depth reflects differences in locomotory efficient. *Biol. Bul.* 192, 262–  
445 278. <https://doi.org/10.2307/1542720>
- 446 Sekiguchi, H., Yamaguchi, Y., Kobayashi, H., 1981. *Bathynomus* (Isopoda: Cirolanidae) attacking  
447 sharks caught in a gill-net. *Bulletin of the Faculty of Fisheries Mie University.* 8, 11–17.
- 448 Smith, K.L., Baldwin, R.J., 1982. Scavenging deep-sea amphipods: Effects of food odor on oxygen  
449 consumption and a proposed metabolic strategy. *Mar. Biol.* 68, 287–298.  
450 <https://doi.org/10.1007/BF00409595>
- 451 Sullivan, K.M., Somero, G.N., 1980. Enzyme activities of fish skeletal muscle and brain as influenced  
452 by depth of occurrence and habits of feeding and locomotion. *Mar. Biol.* 60, 91–99.  
453 <https://doi.org/10.1007/BF00389152>
- 454 Thuesen, E. V., Childress, J.J., 1993a. Enzymatic activities and metabolic rates of pelagic  
455 chaetognaths: Lack of depth-related declines. *Limnol. Oceanogr.* 38, 935–948.  
456 <https://doi.org/10.4319/lo.1993.38.5.0935>
- 457 Thuesen, E. V., Childress, J.J., 1993b. Metabolic rates, enzyme activities and chemical compositions  
458 of some deep-sea pelagic worms, particularly *Nectonemertes mirabilis* (Nemertea;  
459 Hoplonemertinea) and *Poebius meseres* (Annelida; Polychaeta). *Deep. Res. Part I Oceanogr.*  
460 *Res. Pap.* 40, 937–951. [https://doi.org/10.1016/0967-0637\(93\)90082-E](https://doi.org/10.1016/0967-0637(93)90082-E)
- 461 Toledo, L.F., Abe, A.S., Andrade, D.V., 2003. Temperature and meal size effects on the postprandial  
462 metabolism and energetics in a Boid snake. *Physiol. Biochem. Zool.* 76, 240–246.  
463 <https://doi.org/10.1086/374300>

- 464 Wang, T., Hung, C.C.Y., Randall, D.J., 2006. The comparative physiology of food deprivation: From  
465 feast to famine. *Annu. Rev. Physiol.* 68, 223–251.  
466 <https://doi.org/10.1146/annurev.physiol.68.040104.105739>
- 467 Yagi, M., Kanda, T., Takeda, T., Ishimatsu, A., Oikawa, S., 2010. Ontogenetic phase shifts in  
468 metabolism: links to development and anti-predator adaptation. *Proc. R. Soc. B Biol. Sci.* 277,  
469 2793–2801. <https://doi.org/10.1098/rspb.2010.0583>
- 470 Yagi, M., Oikawa, S., 2014. Trends in metabolic scaling toward integrating comparative physiology  
471 and ecology: ecological theory of metabolism. *Hikaku seiri seikagaku (Comparative Physiol.*  
472 *Biochem.)* 31, 20–27. <https://doi.org/10.3330/hikakuseiriseika.31.20>  
473

474

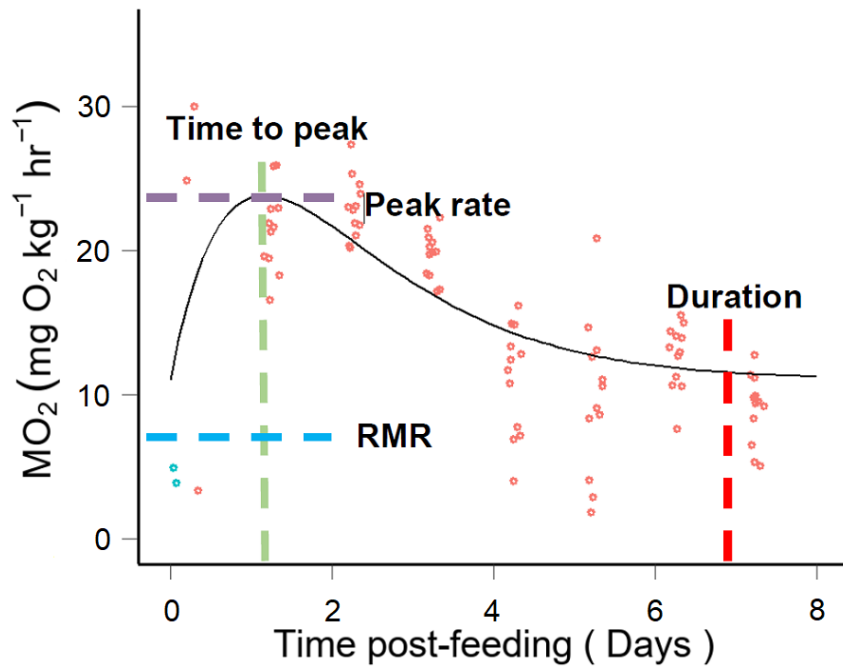

475

476

477

478

479

480

**Fig. 1.** Impact of food intake on the metabolic rate of the deep-sea isopod *Bathynomus doederleini*. An illustration of the postprandial metabolic profile of metabolic rate plotted against time post-feeding (meal size was 11.5 % of body weight). Quantified specific dynamic action (SDA) parameters are highlighted.

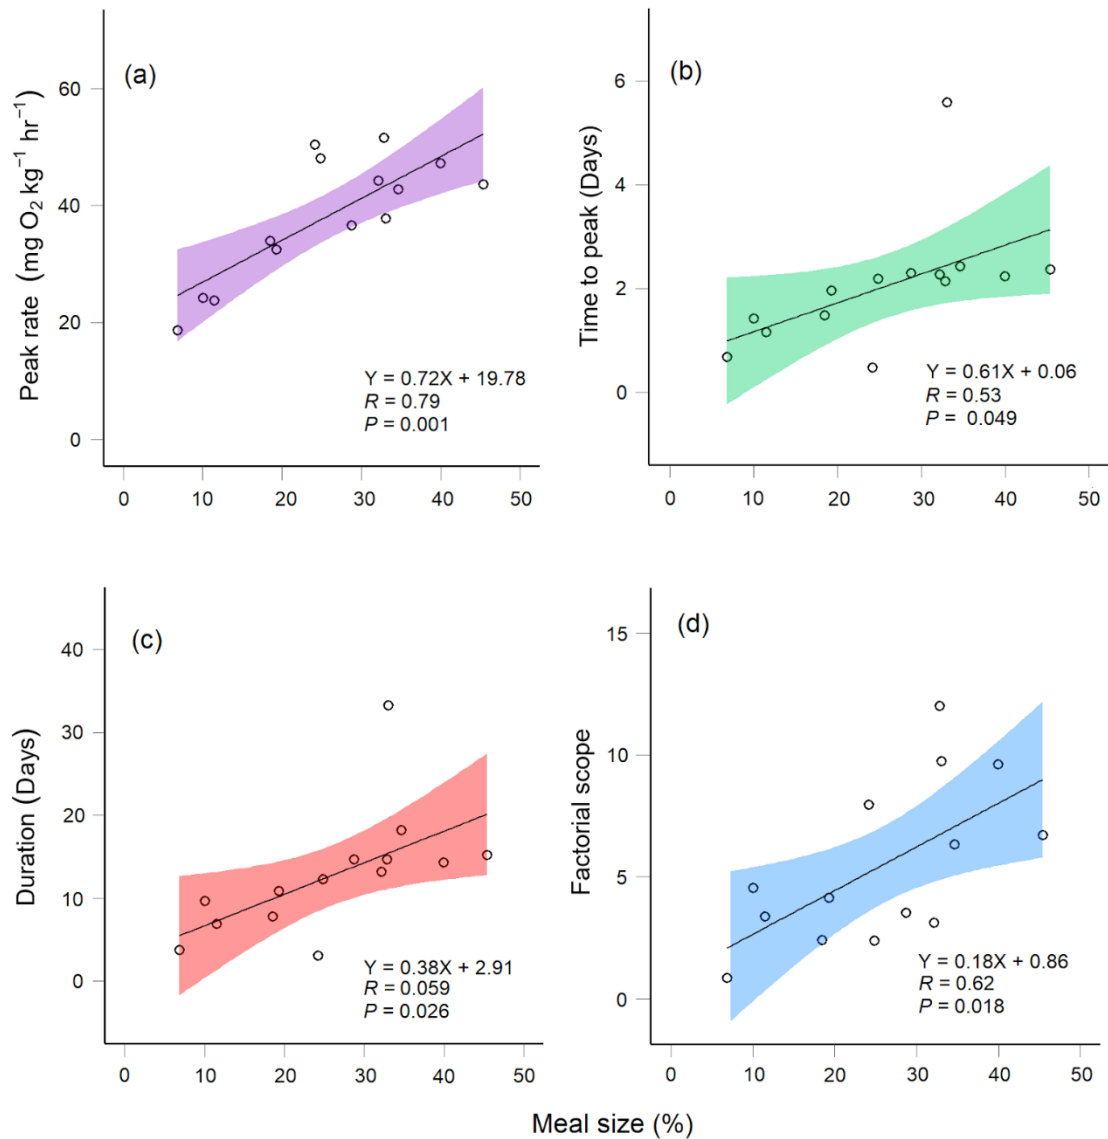

481

482 **Fig. 2.** Relationships between specific dynamic action (SDA) parameters and meal size for  
483 deep-sea isopods *Bathynomus doederleini*. (a) Peak. (b) Time to peak. (c) Duration. (d)  
484 Factorial scope. The shaded areas indicate the 95% confidence interval for the fitted  
485 exponential curve.

486



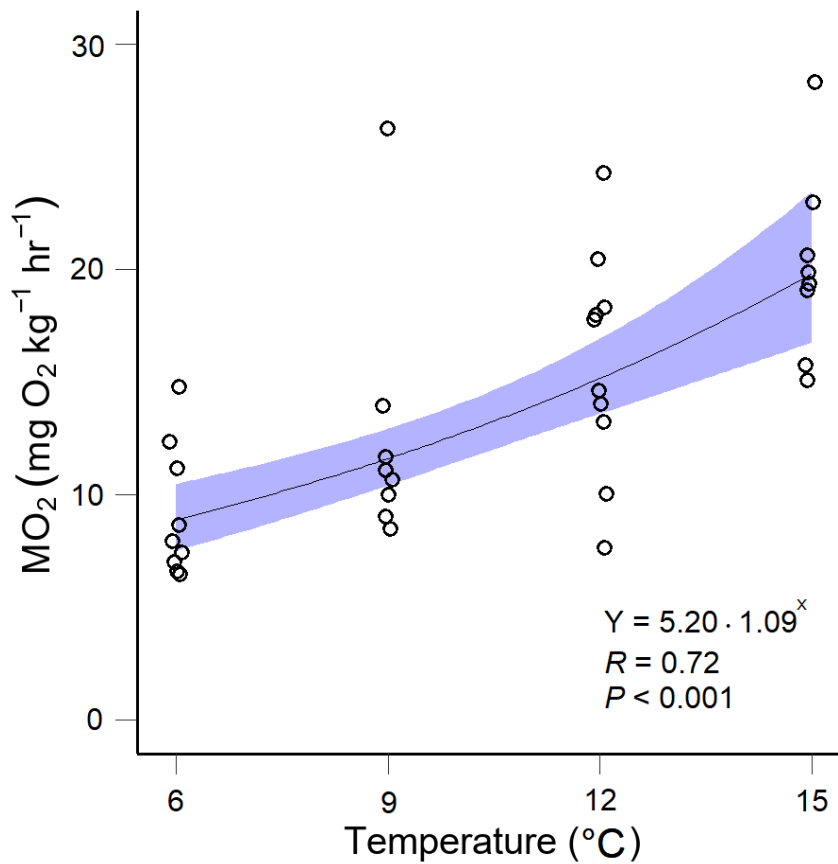

487

488 **Fig. 3.** Effects of temperature on resting metabolic rate ( $MO_2$ ) in deep-sea isopods  
489 *Bathynomus doederleini*. The overall  $Q_{10}$  was 2.36. The shaded area indicates the 95%  
490 confidence interval for the fitted exponential curve.

491

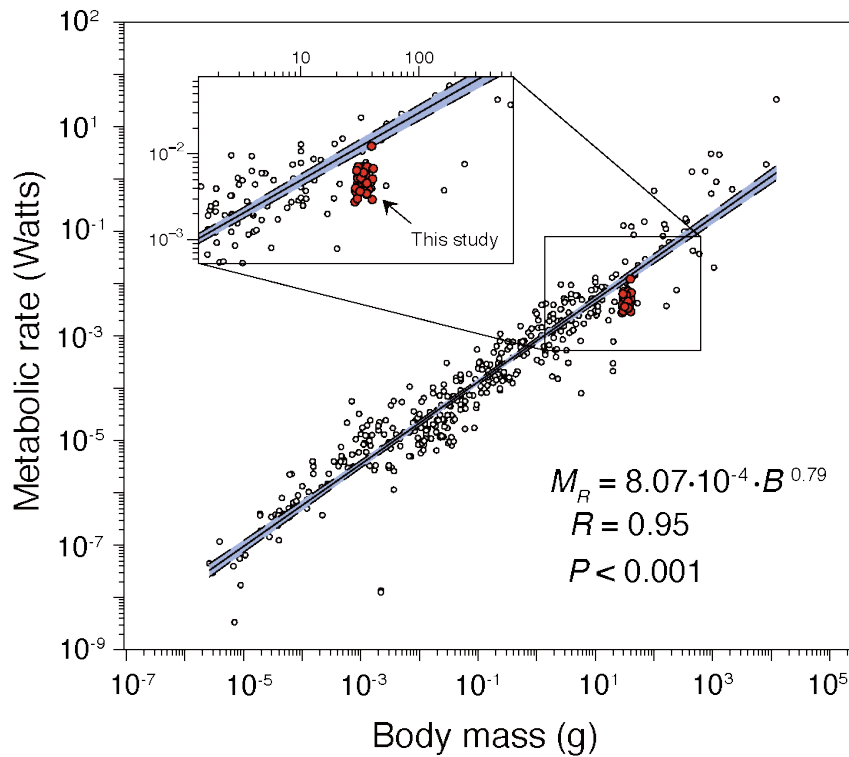

492  
493 **Fig. 4.** Metabolic scaling (the relationship between metabolic rate and wet body mass) in the  
494 deep-sea isopod *Bathynomus doederleini* in comparison to published interspecific  
495 comparisons (Makarieva et al., 2008) amongst aquatic invertebrates. Measurements from  
496 aquatic invertebrates (n = 376) and our measurements of deep-sea isopod (n = 35;  
497 represented by red circles) were adjusted to 25 °C, using the factor  $Q_{10} = 2$ , in accordance  
498 with Makarieva et al. (2008). The regression line and its 95% confidence interval (shaded  
499 area) did not encompass the data from this study.
